# Supplementary material
Source: MDPI journal article supplement (https://www.mdpi.com/2073-4441/12/11/3026)
Supplement: s1 [file s1]

# Geochemical composition of the Lomé Lagoon sediments, Togo: seasonal and spatial variations of major, trace and rare earth element concentrations.

Tchaa Esso-Essinam Badassan <sup>1,2,\*</sup>, Akouvi Massan Duanyawo Avumadi <sup>1,2</sup>, Kamilou Ouro-Sama <sup>2</sup>, Kissao Gnandi <sup>2</sup>, Séverine Jean-Dupuy <sup>1</sup> and Jean-Luc Probst<sup>1,\*</sup>

<sup>1</sup> Laboratoire Ecologie Fonctionnelle et Environnement; Université de Toulouse; CNRS ; UPS ; Toulouse INP ; Campus ENSAT, Avenue de l'Agrobiopole, 31326 Castanet Tolosan, France ; [jean-luc.probst@toulouse-inp.fr](mailto:jean-luc.probst@toulouse-inp.fr)

<sup>2</sup> Laboratoire Gestion Traitement et Valorisation des Déchets, Faculté des sciences, Université de Lomé, B.P 1515, Lomé, Togo ; [kgnandi@yahoo.fr](mailto:kgnandi@yahoo.fr)

\* Correspondence: [badassan13@gmail.com](mailto:badassan13@gmail.com) (T.E.E. B) and [jean-luc.probst@toulouse-inp.fr](mailto:jean-luc.probst@toulouse-inp.fr) (J.L. P)

## Supplementary Materials

**Table S1-** Major element contents in the fine fractions (<63 µm) of the Lomé lagoon sediments during the wet and the dry seasons. S4, S5 and S6 : Lake Bè sites ; S7, S8 and S9 : East Lake sites ; S10, S11 and S12 : West Lake sites. LOI: Loss-On-Ignition which corresponds to the organic matter and the carbonates.

| Major elements (%)                 | Fine fractions of Lomé Lagoon sediments, n=9 |       |       |           |       |       |           |       |       |                 |       |       |           |       |       |           |       |       |
|------------------------------------|----------------------------------------------|-------|-------|-----------|-------|-------|-----------|-------|-------|-----------------|-------|-------|-----------|-------|-------|-----------|-------|-------|
|                                    | Dry season (DS)                              |       |       |           |       |       |           |       |       | Wet season (WS) |       |       |           |       |       |           |       |       |
|                                    | Lake Bè                                      |       |       | East Lake |       |       | West Lake |       |       | Lake Bè         |       |       | East Lake |       |       | West Lake |       |       |
|                                    | S4                                           | S5    | S6    | S7        | S8    | S9    | S10       | S11   | S12   | S4              | S5    | S6    | S7        | S8    | S9    | S10       | S11   | S12   |
| SiO <sub>2</sub> (%)               | 39.07                                        | 41.53 | 44.47 | 47.43     | 47.84 | 45.42 | 37.99     | 36.47 | 38.90 | 43.91           | 36.15 | 41.09 | 35.22     | 36.00 | 38.05 | 46.74     | 39.48 | 41.72 |
| Al <sub>2</sub> O <sub>3</sub> (%) | 11.07                                        | 10.78 | 15.80 | 6.95      | 4.87  | 9.88  | 17.24     | 13.85 | 13.66 | 23.18           | 20.75 | 24.26 | 10.21     | 12.66 | 12.42 | 18.35     | 17.07 | 15.90 |
| Fe <sub>2</sub> O <sub>3</sub> (%) | 6.30                                         | 6.00  | 9.70  | 5.92      | 5.75  | 6.97  | 7.25      | 7.46  | 6.79  | 10.68           | 8.11  | 8.73  | 7.94      | 5.97  | 6.26  | 6.59      | 7.63  | 6.90  |
| MnO (%)                            | 0.09                                         | 0.12  | 0.13  | 0.12      | 0.12  | 0.17  | 0.15      | 0.15  | 0.11  | 0.10            | 0.10  | 0.08  | 0.37      | 0.20  | 0.20  | 0.10      | 0.14  | 0.10  |
| MgO (%)                            | 0.91                                         | 1.04  | 0.84  | 0.76      | 0.86  | 1.02  | 0.99      | 1.01  | 0.94  | 0.88            | 0.95  | 0.78  | 1.76      | 1.36  | 1.28  | 0.68      | 1.07  | 0.86  |
| CaO (%)                            | 14.52                                        | 13.33 | 6.06  | 9.21      | 11.46 | 7.60  | 4.74      | 6.81  | 5.81  | 2.57            | 8.16  | 2.64  | 14.19     | 12.46 | 11.38 | 4.12      | 4.75  | 5.21  |
| Na <sub>2</sub> O (%)              | 0.46                                         | 0.61  | 0.80  | 0.52      | 0.59  | 0.49  | 0.58      | 0.70  | 0.60  | 0.52            | 0.58  | 0.68  | 0.51      | 0.60  | 0.62  | 0.34      | 0.40  | 0.40  |
| K <sub>2</sub> O (%)               | 0.49                                         | 0.64  | 0.88  | 0.41      | 0.47  | 0.68  | 0.59      | 0.55  | 0.51  | 0.86            | 0.61  | 0.63  | 0.98      | 0.67  | 0.65  | 0.44      | 0.63  | 0.46  |
| TiO <sub>2</sub> (%)               | 0.95                                         | 0.94  | 0.94  | 1.01      | 1.45  | 1.05  | 1.11      | 0.98  | 1.01  | 0.79            | 0.67  | 0.77  | 0.69      | 0.83  | 0.87  | 1.33      | 1.12  | 1.16  |
| P <sub>2</sub> O <sub>5</sub> (%)  | 0.34                                         | 0.32  | 0.21  | 0.77      | 2.50  | 0.66  | 0.60      | 0.79  | 0.81  | 0.15            | 0.22  | 0.25  | 0.57      | 0.63  | 0.62  | 0.58      | 0.71  | 0.75  |
| LOI (%)                            | 23.16                                        | 21.46 | 18.33 | 21.93     | 18.24 | 22.59 | 28.45     | 28.83 | 29.59 | 17.24           | 23.34 | 20.16 | 21.89     | 25.56 | 25.16 | 21.13     | 26.51 | 25.42 |

**Table S2-** Rare earth element concentrations in the fine fractions (<63 µm) of the Lomé lagoon sediments during the wet and the dry seasons. S4, S5 and S6 : Lake Bè sites ; S7, S8 and S9 : East Lake sites ; S10, S11 and S12 : West Lake sites.

| REE<br>µg.g <sup>-1</sup> | Fine fractions of Lomé Lagoon sediments, n=9 |      |      |           |      |      |           |      |      |                 |       |       |           |      |      |           |       |       |
|---------------------------|----------------------------------------------|------|------|-----------|------|------|-----------|------|------|-----------------|-------|-------|-----------|------|------|-----------|-------|-------|
|                           | Wet season (WS)                              |      |      |           |      |      |           |      |      | Dry season (DS) |       |       |           |      |      |           |       |       |
|                           | Lake Bè                                      |      |      | East Lake |      |      | West Lake |      |      | Lake Bè         |       |       | East Lake |      |      | West Lake |       |       |
|                           | S4                                           | S5   | S6   | S7        | S8   | S9   | S10       | S11  | S12  | S4              | S5    | S6    | S7        | S8   | S9   | S10       | S11   | S12   |
| La                        | 35.3                                         | 31.7 | 43.9 | 23.6      | 21.7 | 31.9 | 49.0      | 39.1 | 39.8 | 57.1            | 52.9  | 61.8  | 29.8      | 36.9 | 37.1 | 52.6      | 47.1  | 47.3  |
| Ce                        | 78.8                                         | 71.1 | 96.7 | 55.0      | 48.6 | 74.0 | 105.4     | 85.8 | 89.5 | 117.0           | 108.9 | 127.8 | 65.5      | 83.0 | 82.2 | 114.6     | 100.9 | 103.6 |
| Pr                        | 8.1                                          | 7.3  | 10.2 | 5.6       | 5.0  | 7.3  | 10.8      | 8.7  | 9.0  | 12.0            | 11.0  | 13.0  | 6.9       | 8.3  | 8.3  | 11.6      | 10.3  | 10.3  |
| Nd                        | 29.7                                         | 27.6 | 37.3 | 21.3      | 19.0 | 28.2 | 39.3      | 32.5 | 33.6 | 41.9            | 37.9  | 45.1  | 26.8      | 31.5 | 31.6 | 43.3      | 38.0  | 38.5  |
| Sm                        | 5.9                                          | 5.5  | 7.3  | 4.4       | 3.8  | 5.6  | 7.8       | 6.3  | 6.5  | 7.8             | 6.9   | 8.3   | 5.2       | 6.2  | 6.1  | 8.5       | 7.4   | 7.3   |
| Eu                        | 1.1                                          | 1.2  | 1.6  | 0.9       | 0.7  | 1.1  | 1.6       | 1.3  | 1.3  | 1.8             | 1.6   | 1.9   | 1.1       | 1.3  | 1.3  | 1.7       | 1.5   | 1.5   |
| Gd                        | 4.5                                          | 4.4  | 5.8  | 3.6       | 3.2  | 4.3  | 5.9       | 4.9  | 5.0  | 6.1             | 5.4   | 6.4   | 4.1       | 4.7  | 4.7  | 6.6       | 5.7   | 5.8   |
| Tb                        | 0.7                                          | 0.7  | 0.9  | 0.5       | 0.5  | 0.6  | 0.8       | 0.8  | 0.7  | 0.9             | 0.8   | 0.9   | 0.6       | 0.7  | 0.7  | 1.0       | 0.9   | 0.9   |
| Dy                        | 4.0                                          | 4.0  | 5.2  | 3.3       | 3.3  | 3.7  | 4.9       | 4.6  | 4.3  | 5.1             | 4.3   | 5.1   | 3.6       | 4.2  | 4.1  | 5.8       | 5.0   | 5.1   |
| Ho                        | 0.8                                          | 0.9  | 1.1  | 0.7       | 0.8  | 0.8  | 1.0       | 0.9  | 0.9  | 1.0             | 0.8   | 1.0   | 0.7       | 0.8  | 0.8  | 1.2       | 1.0   | 1.0   |
| Er                        | 2.3                                          | 2.5  | 3.0  | 2.0       | 2.4  | 2.1  | 2.6       | 2.5  | 2.5  | 2.6             | 2.1   | 2.4   | 2.0       | 2.2  | 2.2  | 3.1       | 2.6   | 2.7   |
| Tm                        | 0.4                                          | 0.4  | 0.4  | 0.3       | 0.4  | 0.3  | 0.4       | 0.4  | 0.4  | 0.4             | 0.3   | 0.3   | 0.3       | 0.3  | 0.3  | 0.5       | 0.4   | 0.4   |
| Yb                        | 2.6                                          | 2.7  | 3.2  | 2.3       | 3.0  | 2.3  | 2.5       | 2.5  | 2.5  | 2.4             | 1.9   | 2.1   | 2.0       | 2.2  | 2.2  | 3.1       | 2.6   | 2.8   |
| Lu                        | 0.4                                          | 0.5  | 0.5  | 0.4       | 0.6  | 0.4  | 0.4       | 0.4  | 0.4  | 0.4             | 0.3   | 0.3   | 0.3       | 0.3  | 0.3  | 0.5       | 0.4   | 0.4   |

**Table S3-** Average trace element concentrations in the Lomé lagoon sediments (fraction <63µm) and TE concentrations of PAAS, UCC, two local materials (Sed\_R and H3), and some Sediment Quality Guidelines (SQGs). See also TE concentrations for each site in Table S4.

| TE<br>µg.g <sup>-1</sup> | Fine fractions of Lomé Lagoon sediments, n=9 |       |       |                 |       |       |      |      |       |       | SQGs |     |     |     |      |     |     |     |      |     |
|--------------------------|----------------------------------------------|-------|-------|-----------------|-------|-------|------|------|-------|-------|------|-----|-----|-----|------|-----|-----|-----|------|-----|
|                          | Wet season (WS)                              |       |       | Dry season (DS) |       |       | PAAS | UCC  | Sed_R | H3    |      |     |     |     |      |     |     |     |      |     |
|                          | Min                                          | Max   | Mean  | Min             | Max   | Mean  |      |      |       |       | TEL  | ERL | LEL | MEL | PEL  | ERM | SEL | TET | CB   | PEC |
| As                       | 3.9                                          | 24.7  | 9.1   | 8.0             | 23.0  | 13.3  | -    | 1.5  | 1.6   | 1.8   | 5.9  | 33  | 6   | 7   | 17   | 85  | 33  | 17  | 33   |     |
| Ba                       | 255                                          | 444   | 304   | 240             | 345   | 289   | 650  | 550  | 794   | 612   |      |     |     |     |      |     |     |     |      |     |
| Be                       | 0.7                                          | 1.8   | 1.2   | 1.1             | 2.5   | 1.6   | -    | 3    | 1.6   | 2.0   |      |     |     |     |      |     |     |     |      |     |
| Bi                       | 0.1                                          | 0.1   | 0.1   | 0.2             | 0.7   | 0.4   | -    | 0.1  | 0.1   | 0.1   |      |     |     |     |      |     |     |     |      |     |
| Cd                       | 0.4                                          | 2.2   | 0.9   | 0.1             | 0.9   | 0.5   | -    | 0.1  | 0.1   | 0.1   | 0.6  | 5   | 0.6 | 0.9 | 3.5  | 9   | 10  | 3   | 5.0  |     |
| Co                       | 9.4                                          | 17.3  | 13.1  | 12.0            | 17.5  | 14.8  | 23   | 10   | 21    | 33.1  |      |     |     |     |      |     |     |     |      |     |
| Cr                       | 67                                           | 153   | 102   | 77              | 178   | 130   | 110  | 35   | 75.3  | 280   | 37.3 | 80  | 26  | 55  | 90   | 145 | 110 | 100 | 111  |     |
| Cs                       | 0.8                                          | 3.2   | 1.9   | 2.1             | 3.3   | 2.6   | 15   | 3.7  | 2.5   | 2.7   |      |     |     |     |      |     |     |     |      |     |
| Cu                       | 46.3                                         | 334.6 | 112.6 | 35.9            | 94.1  | 63.6  | 50   | 25   | 35.8  | 40.3  | 35.7 | 70  | 16  | 28  | 197  | 390 | 110 | 86  | 149  |     |
| Ga                       | 7.4                                          | 22.3  | 15.4  | 14.1            | 30.4  | 22.6  | 17.5 | 17   | 17.1  | 21.7  |      |     |     |     |      |     |     |     |      |     |
| Ge                       | 0.8                                          | 1.7   | 1.2   | 1.0             | 1.8   | 1.5   | -    | 1.6  | 1.5   | 1.7   |      |     |     |     |      |     |     |     |      |     |
| Hf                       | 7.0                                          | 61.9  | 24.3  | 3.3             | 11.4  | 7.6   | -    | 5.8  | 16.6  | 11.0  |      |     |     |     |      |     |     |     |      |     |
| Mo                       | 4.2                                          | 7.1   | 5.2   | 2.8             | 8.7   | 4.6   | 1    | 1.5  | 0.9   | 0.8   |      |     |     |     |      |     |     |     |      |     |
| Nb                       | 13.7                                         | 22.9  | 17.4  | 10.9            | 25.4  | 16.7  | 19   | 25   | 17.2  | 18.3  |      |     |     |     |      |     |     |     |      |     |
| Ni                       | 20.1                                         | 36.8  | 27.4  | 30.8            | 42.7  | 37.7  | 55   | 20   | 34.4  | 151.3 | 18   | 30  | 16  | 35  | 36   | 50  | 75  | 61  | 48.6 |     |
| Pb                       | 50.3                                         | 716.6 | 182.3 | 34.1            | 188.3 | 98.7  | 20   | 20   | 21.3  | 19.0  | 35   | 35  | 31  | 42  | 91.3 | 110 | 250 | 170 | 128  |     |
| Rb                       | 13.6                                         | 34.9  | 23.7  | 26.6            | 42.7  | 33.7  | 160  | 112  | 86.6  | 70.4  |      |     |     |     |      |     |     |     |      |     |
| Sb                       | 2.1                                          | 7.6   | 3.4   | 0.8             | 4.1   | 2.3   | -    | 0.2  | 0.2   | 0.2   |      |     |     |     |      |     |     |     |      |     |
| Sc                       | 4.9                                          | 15.2  | 10.4  | 9.5             | 19.9  | 15.3  | 16   | 11   | 14.4  | 20.0  |      |     |     |     |      |     |     |     |      |     |
| Sn                       | 8                                            | 81.8  | 31.0  | 3.13            | 17.4  | 9.6   | 4    | 2.7  | 2.2   | 2.5   |      |     |     |     |      |     |     |     |      |     |
| Sr                       | 214                                          | 497   | 342   | 151             | 863   | 361   | 200  | 350  | 184.4 | 142   |      |     |     |     |      |     |     |     |      |     |
| Ta                       | 1.1                                          | 1.9   | 1.4   | 0.9             | 2.2   | 1.4   | -    | 1    | 1.5   | 1.5   |      |     |     |     |      |     |     |     |      |     |
| Th                       | 7.8                                          | 12.2  | 9.8   | 7.9             | 14.5  | 10.8  | 14.6 | 10.7 | 16.6  | 12.8  |      |     |     |     |      |     |     |     |      |     |
| U                        | 2.4                                          | 5.0   | 3.7   | 2.6             | 3.2   | 2.8   | 3.1  | 2.8  | 3.5   | 2.7   |      |     |     |     |      |     |     |     |      |     |
| V                        | 66.7                                         | 133.7 | 87.9  | 73.4            | 172.9 | 113.6 | 150  | 60   | 87.2  | 115.3 |      |     |     |     |      |     |     |     |      |     |
| W                        | -                                            | 1.9   | 1.8   | 1.0             | 2.1   | 1.5   | -    | 2    | 1.2   | 1.2   |      |     |     |     |      |     |     |     |      |     |
| Y                        | 19.2                                         | 29.2  | 23.0  | 20.0            | 29.0  | 23.7  | 27   | 22   | 44.4  | 39.1  |      |     |     |     |      |     |     |     |      |     |
| Zn                       | 179                                          | 1696  | 704   | 114             | 950   | 438   | 85   | 71   | 59    | 73    | 123  | 120 | 120 | 150 | 315  | 270 | 820 | 540 | 459  |     |
| Zr                       | 271                                          | 2446  | 956   | 119             | 451   | 302   | 210  | 190  | 651   | 427   |      |     |     |     |      |     |     |     |      |     |

Sediment Quality Guidelines for sediments (SQGs): TEL-Threshold Effect Level [73], ERL- Effects Range Low [70], LEL-Lowest Effect Level [72], MEL- Minimum Effect Level [71], PEL- Probable Effect Level [73], ERM-Effect Range Median [70], SEL-Severe Effect Level [72], TET- Toxic Effect Threshold [71], CB PEC-Consensus-Based for Probable Effect Concentrations [74].

**Table S4-** Trace element concentrations in the fine fractions (<63 µm) of the Lomé lagoon sediments during the wet and the dry seasons. S4, S5 and S6 : Lake Bè sites ; S7, S8 and S9 : East Lake sites ; S10, S11 and S12 : West Lake sites.

| TE (µg.g <sup>-1</sup> ) | Fine fractions of Lomé Lagoon sediments, n=9 |       |       |           |       |       |           |       |       |                 |      |       |           |       |       |           |       |       |
|--------------------------|----------------------------------------------|-------|-------|-----------|-------|-------|-----------|-------|-------|-----------------|------|-------|-----------|-------|-------|-----------|-------|-------|
|                          | Wet season (WS)                              |       |       |           |       |       |           |       |       | Dry season (DS) |      |       |           |       |       |           |       |       |
|                          | Lake Bè                                      |       |       | East Lake |       |       | West Lake |       |       | Lake Bè         |      |       | East Lake |       |       | West Lake |       |       |
|                          | S4                                           | S5    | S6    | S7        | S8    | S9    | S10       | S11   | S12   | S4              | S5   | S6    | S7        | S8    | S9    | S10       | S11   | S12   |
| As                       | 9.4                                          | 9.9   | 24.7  | 8.5       | 9.2   | 6.0   | 4.7       | 3.9   | 5.6   | 23.1            | 16.2 | 17.9  | 13.0      | 10.1  | 11.2  | 8.0       | 10.0  | 9.9   |
| Ba                       | 296.7                                        | 338.9 | 443.8 | 254.9     | 302.2 | 281.9 | 266.4     | 274.1 | 275.4 | 328             | 251  | 240   | 345       | 304   | 317   | 246.7     | 262.1 | 309.8 |
| Be                       | 1.0                                          | 1.1   | 1.8   | 0.7       | -     | 0.9   | 1.4       | 1.2   | 1.1   | 2.5             | 2.1  | 2.5   | 1.3       | 1.12  | 1.2   | 1.3       | 1.4   | 1.2   |
| Bi                       | -                                            | -     | -     | -         | 0.1   | -     | 0.1       | -     | -     | 0.2             | 0.2  | 0.2   | 0.2       | 0.4   | 0.4   | 0.5       | 0.7   | 0.7   |
| Cd                       | 1.0                                          | 1.0   | 0.9   | 1.0       | 2.2   | 1.0   | 0.4       | 0.4   | 0.5   | 0.1             | 0.2  | 0.2   | 0.3       | 0.6   | 0.7   | 0.6       | 0.8   | 0.9   |
| Co                       | 10.8                                         | 10.2  | 13    | 13.1      | 9.4   | 12.1  | 17.3      | 16.1  | 16.2  | 14.1            | 12.1 | 12.8  | 14.9      | 15.0  | 14.7  | 15.2      | 17.5  | 16.8  |
| Cr                       | 103                                          | 103.8 | 153.3 | 67.3      | 73.3  | 80.7  | 114       | 116.9 | 108.2 | 177             | 155  | 178.2 | 77.1      | 93.8  | 99.7  | 129.6     | 126.9 | 130.7 |
| Cs                       | 1.6                                          | 1.5   | 1.9   | 1.1       | 0.8   | 1.9   | 3.2       | 2.5   | 2.5   | 2.6             | 2.3  | 2.6   | 2.1       | 2.3   | 2.2   | 3.2       | 3.3   | 3.0   |
| Cu                       | 80.2                                         | 83.4  | 46.3  | 145.1     | 334.6 | 85.8  | 72.2      | 87.4  | 78.2  | 35.9            | 40.9 | 47.3  | 40.1      | 73.8  | 88.5  | 67.5      | 84.3  | 94.1  |
| Ga                       | 14.8                                         | 13.8  | 19.7  | 10.0      | 7.4   | 13.9  | 22.3      | 18.5  | 18.4  | 28.5            | 25.8 | 30.4  | 14.1      | 17.1  | 17.0  | 24.9      | 23.1  | 22.2  |
| Ge                       | 1.0                                          | 1.2   | 1.4   | 0.8       | 0.9   | 1.3   | 1.7       | 1.1   | 1.2   | 1.7             | 1.5  | 1.8   | 1.1       | 1.2   | 1.3   | 1.8       | 1.6   | 1.6   |
| Hf                       | 26.5                                         | 25.6  | 29.1  | 26.1      | 61.9  | 23.3  | 7.0       | 9.0   | 10.0  | 5.5             | 3.3  | 3.6   | 11.0      | 7.7   | 9.2   | 11.4      | 7.6   | 9.5   |
| Mo                       | 4.2                                          | 4.2   | 5.7   | 6.8       | 4.2   | 4.7   | 4.8       | 4.9   | 7.1   | 3.1             | 4.0  | 3.9   | 8.7       | 5.1   | 5.8   | 2.8       | 4.0   | 4.3   |
| Nb                       | 15.1                                         | 13.7  | 13.9  | 16.3      | 18.4  | 18.5  | 22.9      | 18.3  | 19.3  | 12              | 10.9 | 12.5  | 12.0      | 16.8  | 16.1  | 25.4      | 21.9  | 23.1  |
| Ni                       | 21.6                                         | 22.2  | 31.1  | 22.6      | 20.1  | 27.8  | 36.8      | 32.0  | 32.2  | 42.6            | 35.7 | 38.9  | 30.8      | 34.2  | 35.9  | 38.5      | 42.8  | 40.0  |
| Pb                       | 88.9                                         | 100.4 | 50.3  | 101.4     | 716.6 | 217.8 | 140.3     | 141   | 83.6  | 34.1            | 42.4 | 54.1  | 58.9      | 138.7 | 188.3 | 96.3      | 141.2 | 134.4 |
| Rb                       | 19.7                                         | 23.5  | 34.9  | 14.3      | 13.6  | 27.6  | 31.2      | 24.3  | 24.6  | 42.7            | 32.7 | 35.2  | 41.5      | 31.1  | 29.9  | 27.5      | 36.5  | 26.6  |
| Sb                       | 3.7                                          | 3.0   | 2.3   | 3.8       | 7.7   | 2.7   | 2.1       | 3.1   | 2.6   | 0.8             | 1.3  | 1.2   | 1.2       | 2.9   | 3.7   | 2.5       | 3.0   | 4.0   |
| Sc                       | 9.6                                          | 9.6   | 13.6  | 6.7       | 4.9   | 9.1   | 15.2      | 12.7  | 12.4  | 19.6            | 17.1 | 19.9  | 9.5       | 11.7  | 11.5  | 17.4      | 15.9  | 14.9  |
| Sn                       | 14.3                                         | 12.2  | 8.0   | 59.3      | 81.8  | 49.0  | 15.5      | 22.2  | 16.9  | 3.1             | 3.6  | 4.3   | 4.8       | 11.3  | 15.2  | 10.7      | 17.4  | 15.9  |
| Sr                       | 497                                          | 480   | 299.6 | 301.2     | 419.4 | 335.1 | 213.7     | 275.1 | 258.7 | 164             | 286  | 151   | 863       | 579   | 567   | 177.5     | 222.5 | 234.8 |
| Ta                       | 1.2                                          | 1.1   | 1.3   | 1.3       | 1.4   | 1.5   | 1.9       | 1.5   | 1.6   | 1.0             | 0.9  | 1.0   | 1.0       | 1.3   | 1.4   | 2.2       | 1.9   | 1.9   |
| Th                       | 11.6                                         | 8.6   | 10.1  | 7.8       | 8.6   | 9.1   | 12.2      | 10.2  | 10.5  | 10.5            | 8.9  | 10.3  | 7.9       | 9.6   | 9.6   | 14.6      | 12.8  | 13.1  |
| U                        | 3.7                                          | 3.5   | 4.6   | 5.0       | 4.9   | 3.1   | 2.4       | 2.8   | 3.0   | 2.7             | 2.7  | 2.6   | 2.8       | 3.1   | 3.2   | 2.6       | 2.7   | 2.8   |
| V                        | 100.6                                        | 98.3  | 133.7 | 86.8      | 73.2  | 66.7  | 72.8      | 74.9  | 83.8  | 173             | 145  | 167   | 73.4      | 76.6  | 79.8  | 111.9     | 93.4  | 102.6 |
| W                        | -                                            | -     | -     | -         | -     | 1.8   | 1.8       | 1.6   | 1.9   | 1.0             | 1.0  | 1.1   | 1.1       | 1.5   | 1.6   | 2.1       | 2.0   | 2.1   |
| Y                        | 21.7                                         | 23.8  | 29.2  | 19.2      | 21.2  | 19.7  | 24.8      | 24.2  | 23.4  | 24.6            | 20.9 | 24.3  | 20.0      | 21.6  | 21.4  | 29.0      | 25.0  | 26.5  |
| Zn                       | 362.1                                        | 266.5 | 179.3 | 854.4     | 1696  | 751.6 | 632.4     | 823.6 | 771.4 | 114             | 154  | 159.7 | 192.3     | 454.6 | 525.7 | 550.5     | 837.3 | 950   |
| Zr                       | 1012                                         | 1030  | 1162  | 1033      | 2446  | 909.8 | 270.9     | 346.1 | 398.7 | 207             | 119  | 134   | 451       | 309   | 365   | 450       | 294   | 385   |

**Table S5-** Ranking of priority sites with respect to sediment contamination according to ERM and PEL quotients ( $Q_{ERM}$  and  $Q_{PEL}$ ) and to the probability (%) of toxicity for benthic organisms (after [99]). See  $Q_{ERM}$  and  $Q_{PEL}$  values calculated for Lomé lagoon sediments in Table S6.

| Q <sub>ERM</sub> and Q <sub>PEL</sub> limit values                                              |                               |                               |                        |
|-------------------------------------------------------------------------------------------------|-------------------------------|-------------------------------|------------------------|
| Q <sub>ERM</sub> > 1.5                                                                          | 0.51 < Q <sub>ERM</sub> < 1.5 | 0.11 < Q <sub>ERM</sub> < 0.5 | Q <sub>ERM</sub> < 0.1 |
| Q <sub>PEL</sub> > 2.3                                                                          | 1.51 < Q <sub>PEL</sub> < 2.3 | 0.11 < Q <sub>PEL</sub> < 1.5 | Q <sub>PEL</sub> < 0.1 |
| Probability of toxicity in amphipod survival tests [100]<br>Q <sub>ERM</sub> - Q <sub>PEL</sub> |                               |                               |                        |
| 74% - 76%                                                                                       | 46% - 50%                     | 30% - 25%                     | 12% - 10%              |
| Priority sites                                                                                  |                               |                               |                        |
| Highest                                                                                         | Medium-high                   | Medium-low                    | Lowest                 |

**Table S6-** PEL and ERM quotients, respectively  $Q_{PEL}$  and  $Q_{ERM}$  calculated for the all the sites (S4, S5 and S6 for Lake Bè, S7, S8 and S9 for East Lake and S10, S11 and S12 for West Lake) for the two seasons (WS, wet season and DS, dry season). **Bold figures**: highest priorities, ***bold italics*** : medium-high priorities, normal figures: medium-low priorities, *italics* : low priorities (see table S5 for the corresponding  $Q_{PEL}$  and  $Q_{ERM}$  limit values and for the toxicity probabilities).

| TE |                  | S4          |             | S5          |             | S6          |             | S7          |             | S8          |             | S9          |             | S10         |             | S11         |             | S12         |             |
|----|------------------|-------------|-------------|-------------|-------------|-------------|-------------|-------------|-------------|-------------|-------------|-------------|-------------|-------------|-------------|-------------|-------------|-------------|-------------|
|    |                  | WS          | DS          |
| As | Q <sub>PEL</sub> | 0.55        | 1.36        | 0.58        | 0.96        | 1.46        | 1.05        | 0.50        | 0.77        | 0.54        | 0.60        | 0.36        | 0.66        | 0.28        | 0.47        | 0.23        | 0.59        | 0.33        | 0.58        |
|    | Q <sub>ERM</sub> | 0.11        | 0.27        | 0.12        | 0.19        | 0.29        | 0.21        | <i>0.10</i> | 0.15        | 0.11        | 0.12        | <i>0.07</i> | 0.13        | <i>0.06</i> | <i>0.09</i> | <i>0.05</i> | 0.12        | <i>0.07</i> | 0.12        |
| Cd | Q <sub>PEL</sub> | 0.29        | 0.03        | 0.28        | 0.05        | 0.27        | 0.05        | 0.29        | 0.07        | <b>0.63</b> | 0.16        | 0.28        | 0.19        | 0.11        | 0.18        | 0.11        | 0.23        | 0.14        | 0.26        |
|    | Q <sub>ERM</sub> | 0.11        | <i>0.01</i> | 0.11        | <i>0.02</i> | 0.11        | <i>0.02</i> | 0.11        | <i>0.03</i> | 0.25        | <i>0.06</i> | 0.11        | <i>0.08</i> | <i>0.04</i> | <i>0.07</i> | <i>0.04</i> | <i>0.09</i> | <i>0.05</i> | <i>0.10</i> |
| Cr | Q <sub>PEL</sub> | 1.15        | <b>1.97</b> | 1.15        | <b>1.72</b> | <b>1.70</b> | <b>1.98</b> | 0.75        | 0.86        | 0.81        | 1.04        | 0.90        | 1.11        | 1.27        | 1.44        | 1.30        | 1.41        | 1.20        | 1.45        |
|    | Q <sub>ERM</sub> | <b>0.71</b> | <b>1.22</b> | <b>0.72</b> | <b>1.07</b> | <b>1.06</b> | <b>1.23</b> | 0.46        | <b>0.53</b> | <b>0.51</b> | <b>0.65</b> | <b>0.56</b> | <b>0.69</b> | <b>0.79</b> | <b>0.89</b> | <b>0.81</b> | <b>0.88</b> | <b>0.75</b> | <b>0.90</b> |
| Cu | Q <sub>PEL</sub> | 0.41        | 0.18        | 0.42        | 0.21        | 0.24        | 0.24        | 0.74        | 0.20        | <b>1.70</b> | 0.37        | 0.44        | 0.45        | 0.37        | 0.34        | 0.44        | 0.43        | 0.40        | 0.48        |
|    | Q <sub>ERM</sub> | 0.21        | <i>0.09</i> | 0.21        | <i>0.10</i> | 0.12        | 0.12        | 0.37        | <i>0.10</i> | <b>0.86</b> | 0.19        | 0.22        | 0.23        | 0.19        | 0.17        | 0.22        | 0.22        | 0.20        | 0.24        |
| Ni | Q <sub>PEL</sub> | 0.60        | 1.18        | 0.62        | 0.99        | 0.86        | 1.08        | 0.63        | 0.86        | 0.56        | 0.95        | 0.77        | 1.00        | 1.02        | 1.07        | 0.89        | 1.19        | 0.89        | 1.11        |
|    | Q <sub>ERM</sub> | 0.43        | <b>0.85</b> | 0.44        | <b>0.71</b> | <b>0.62</b> | <b>0.78</b> | 0.45        | <b>0.62</b> | 0.40        | <b>0.68</b> | <b>0.56</b> | <b>0.72</b> | <b>0.74</b> | <b>0.77</b> | <b>0.64</b> | <b>0.85</b> | <b>0.64</b> | <b>0.80</b> |
| Pb | Q <sub>PEL</sub> | 0.97        | 0.37        | 1.10        | 0.46        | 0.55        | 0.59        | 1.11        | 0.65        | <b>7.85</b> | <b>1.52</b> | <b>2.39</b> | <b>2.06</b> | <b>1.54</b> | 1.05        | <b>1.55</b> | <b>1.55</b> | 0.92        | 1.47        |
|    | Q <sub>ERM</sub> | <b>0.81</b> | 0.31        | <b>0.91</b> | 0.39        | 0.46        | 0.49        | <b>0.92</b> | <b>0.54</b> | <b>6.51</b> | <b>1.26</b> | <b>1.98</b> | <b>1.71</b> | <b>1.28</b> | <b>0.88</b> | <b>1.28</b> | <b>1.28</b> | <b>0.76</b> | <b>1.22</b> |
| Zn | Q <sub>PEL</sub> | 1.15        | 0.36        | 0.85        | 0.49        | 0.57        | 0.51        | <b>2.71</b> | 0.61        | <b>5.38</b> | 1.44        | <b>2.39</b> | <b>1.67</b> | <b>2.01</b> | <b>1.75</b> | <b>2.61</b> | <b>2.66</b> | <b>2.45</b> | <b>3.02</b> |
|    | Q <sub>ERM</sub> | <b>1.34</b> | 0.42        | <b>0.99</b> | <b>0.57</b> | <b>0.66</b> | <b>0.59</b> | <b>3.16</b> | <b>0.71</b> | <b>6.28</b> | <b>1.68</b> | <b>2.78</b> | <b>1.95</b> | <b>2.34</b> | <b>2.04</b> | <b>3.05</b> | <b>3.10</b> | <b>2.86</b> | <b>3.52</b> |
